# Supplementary material
Source: PubMed Central journal article supplement (PMC3647462)

Lee et. al., supplemental Figure 1

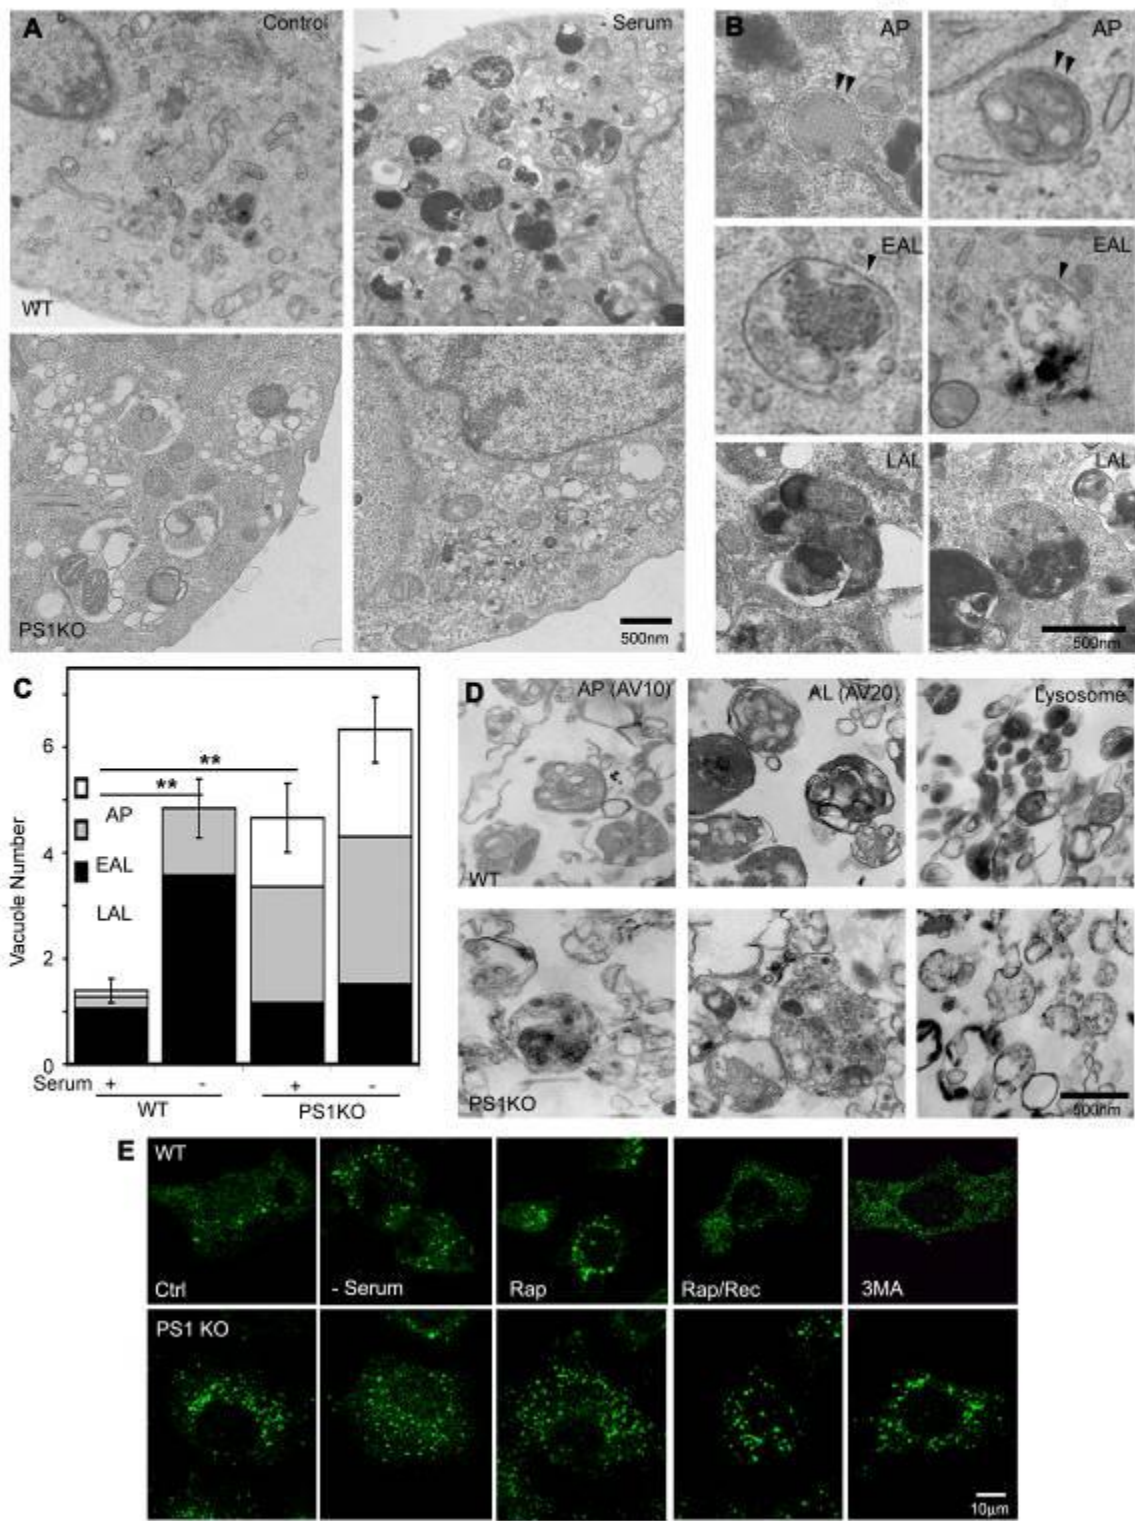

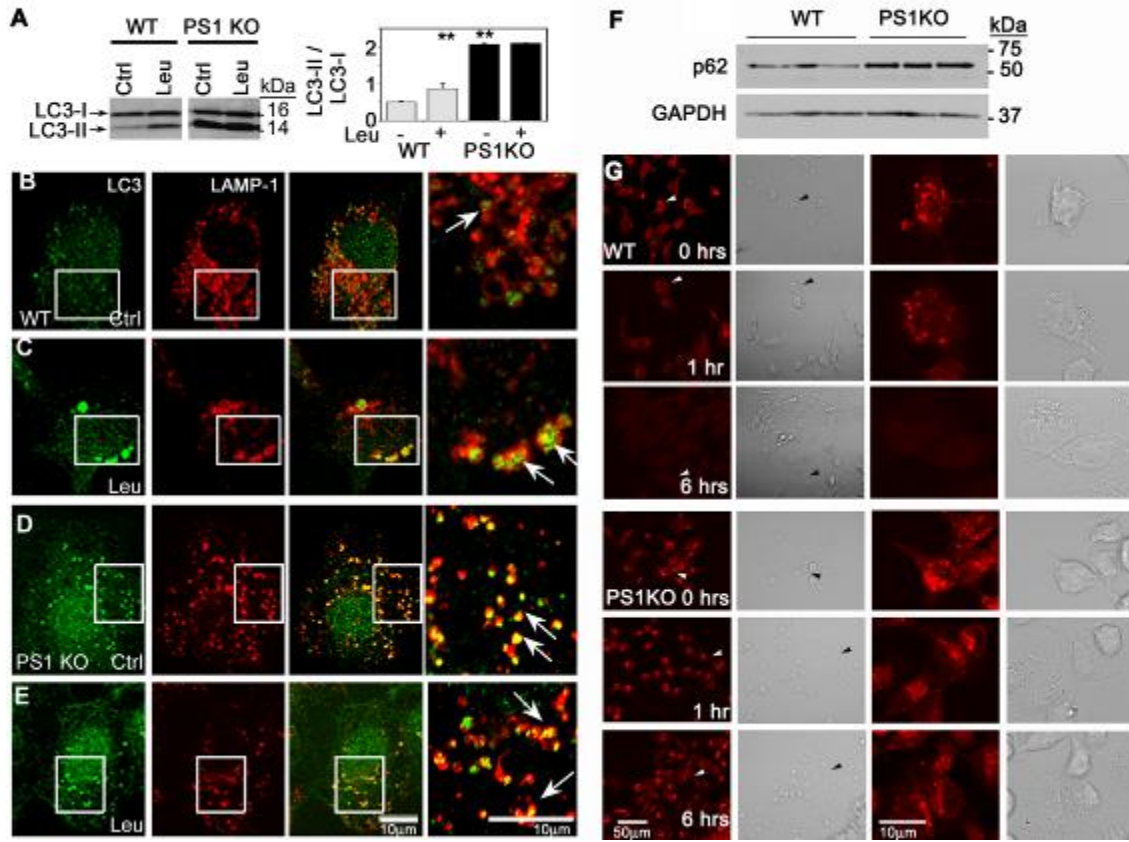

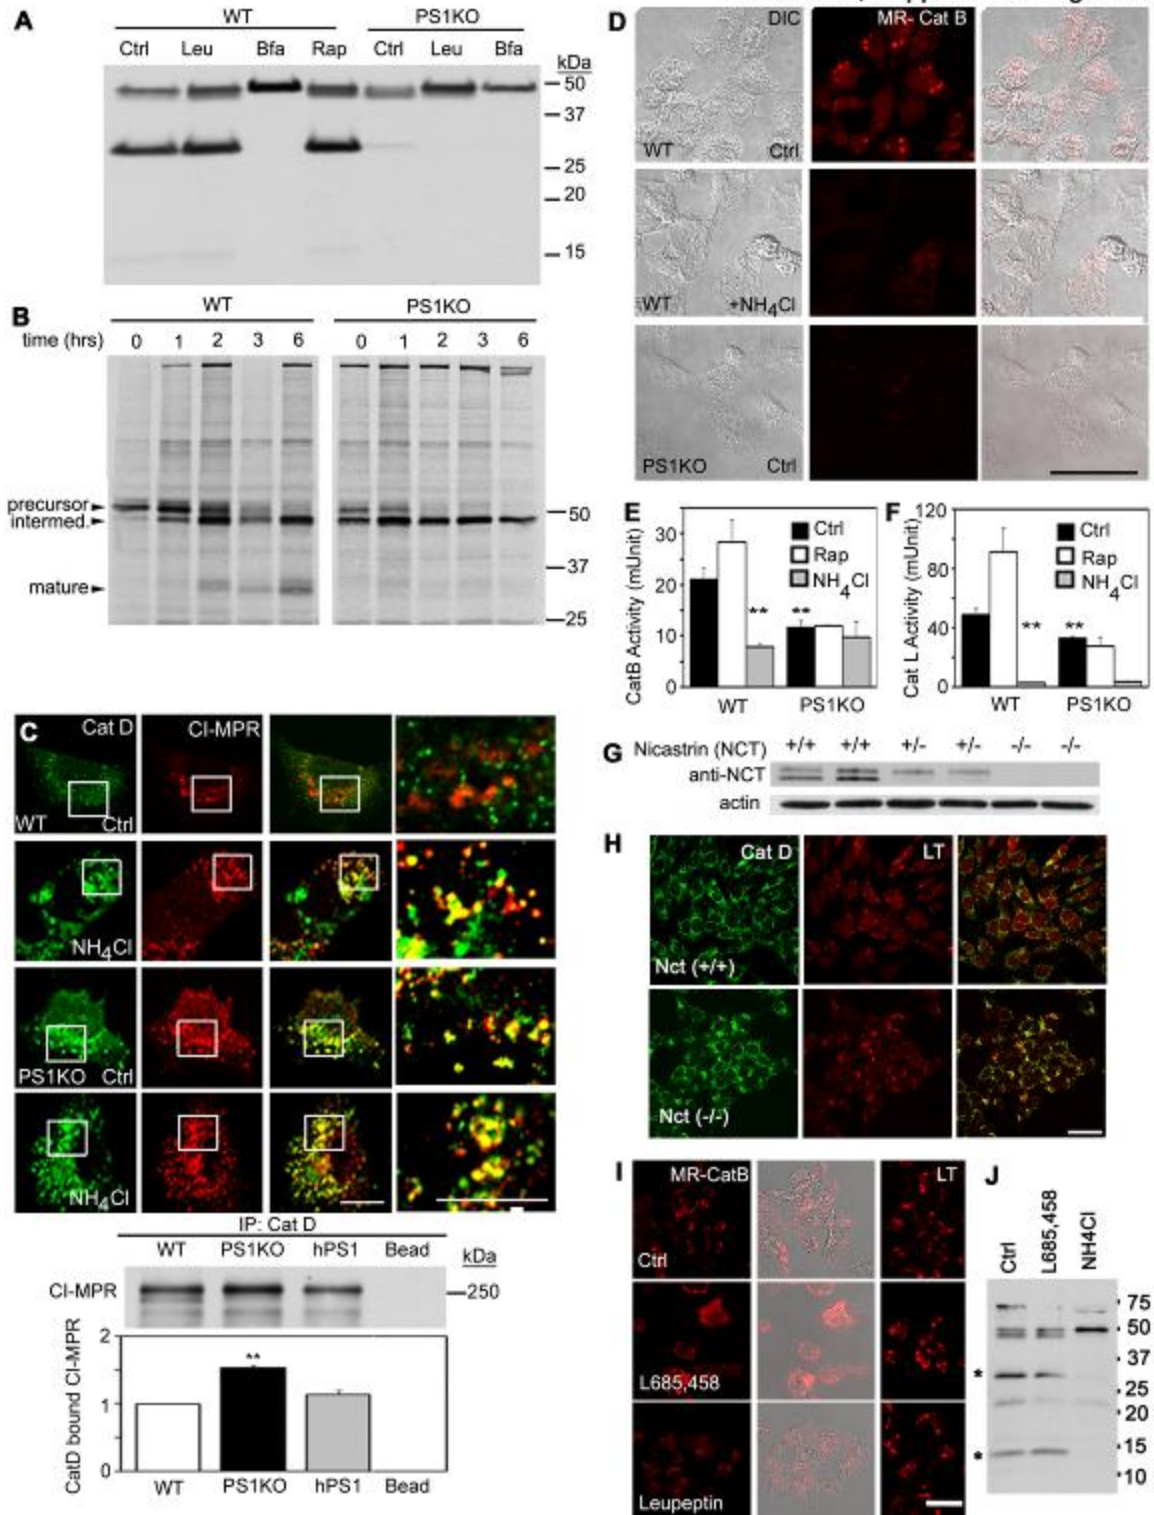

Lee et. al., Supplemental Figure 4

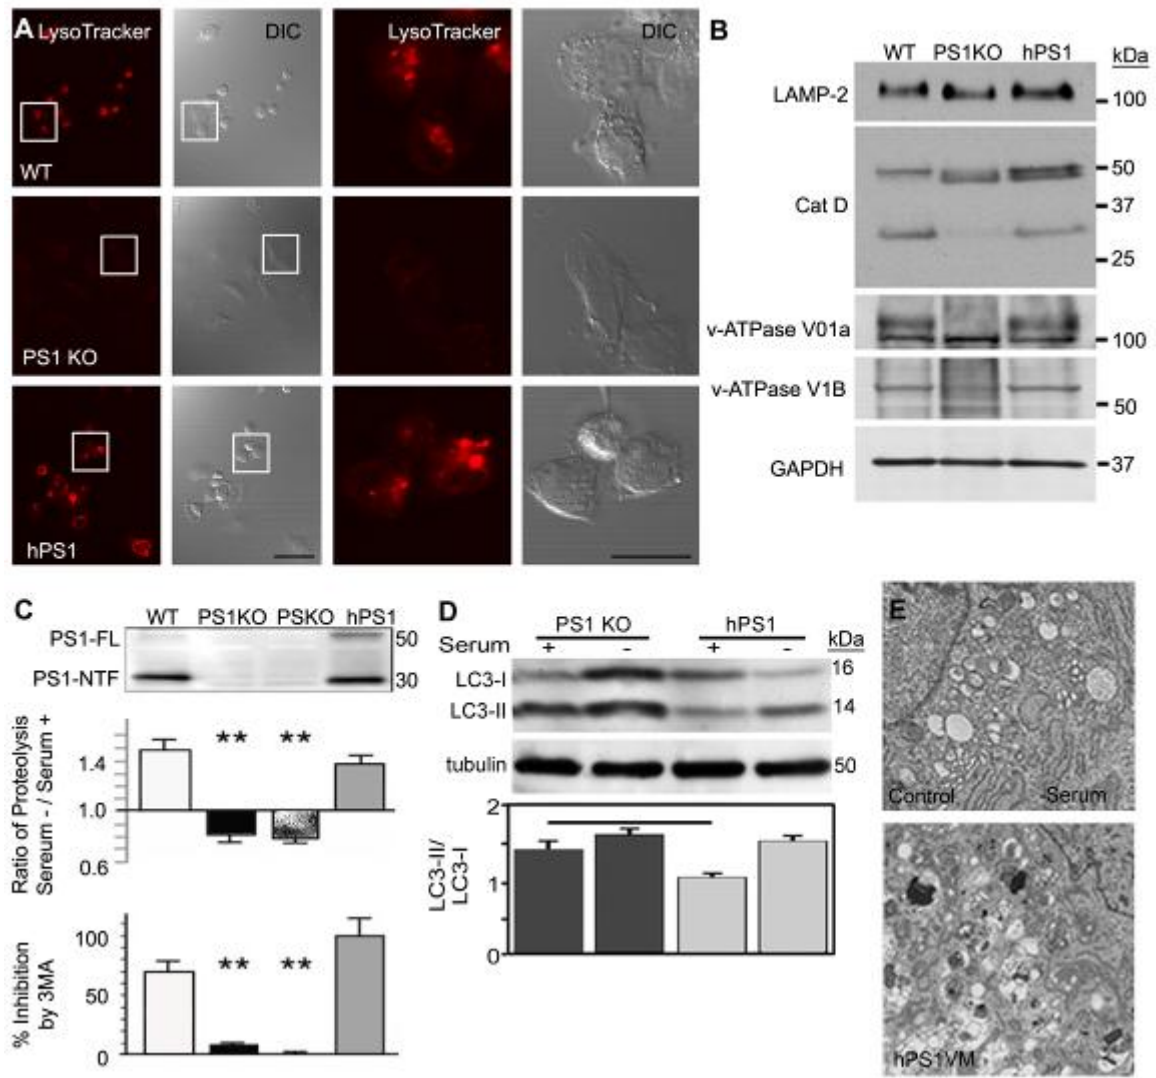



Lee et al., Supplemental Fig. 5

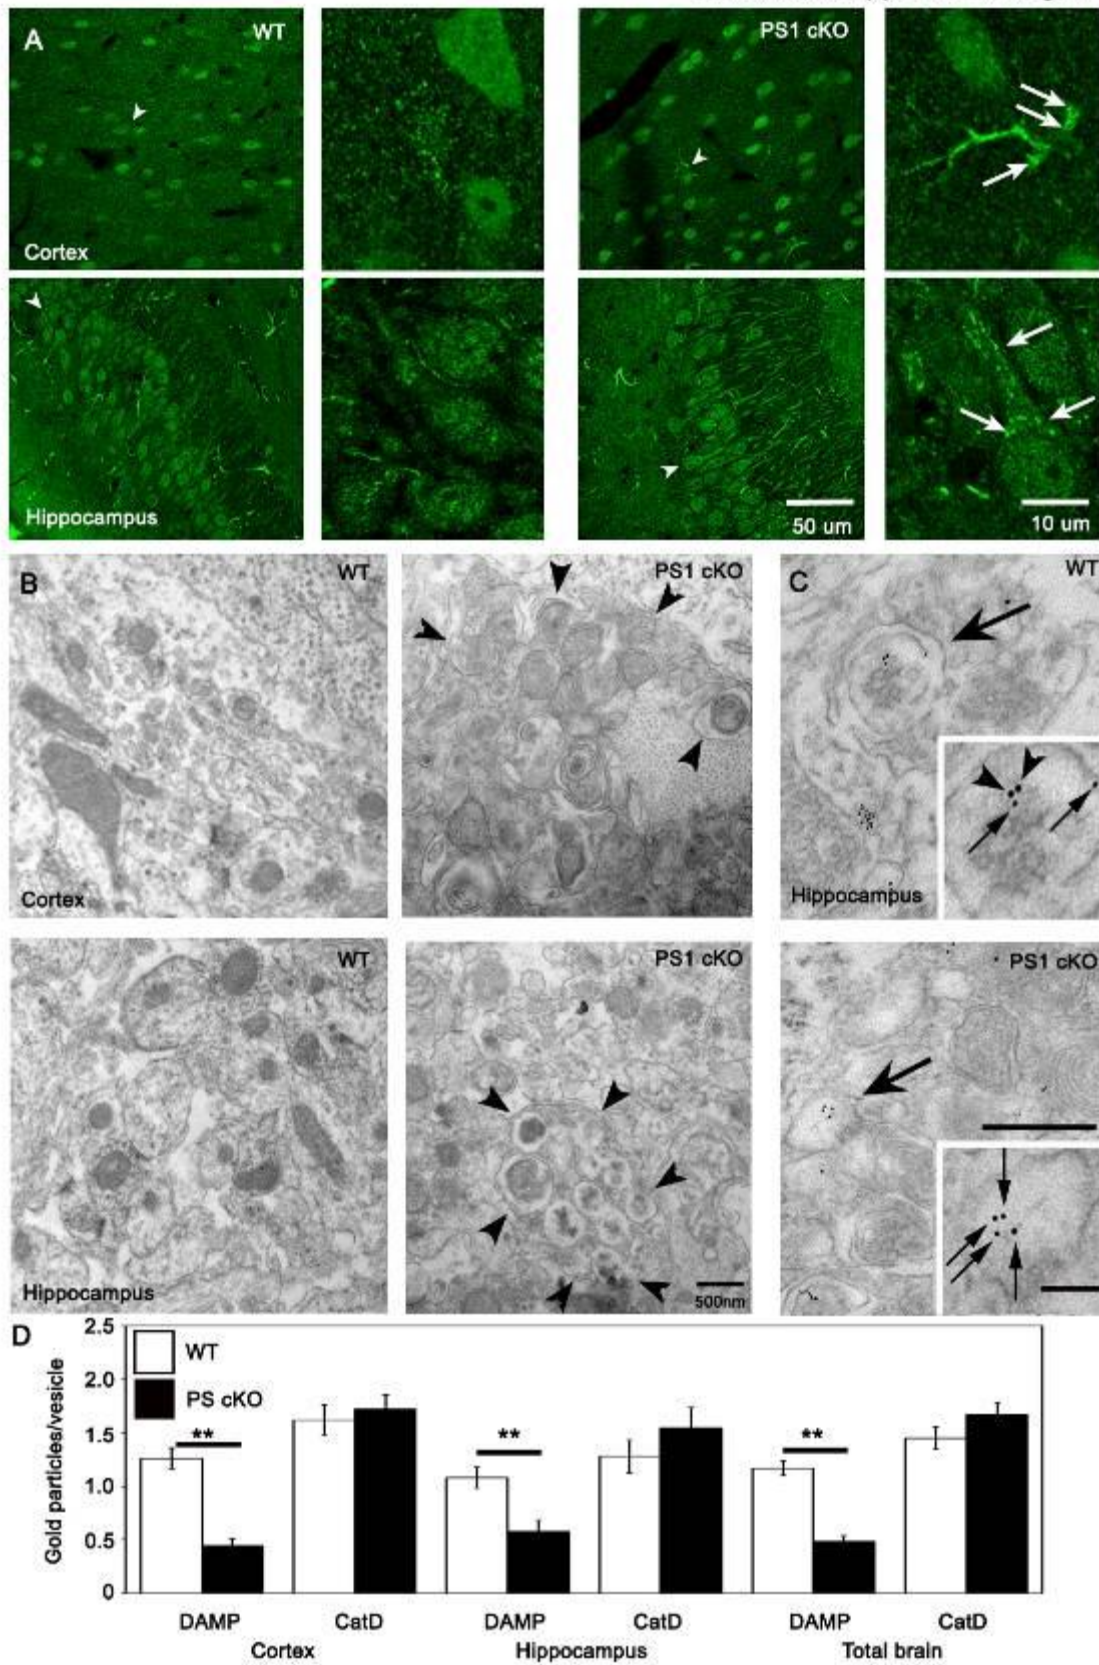

Lee et al., Supplemental Figure 6

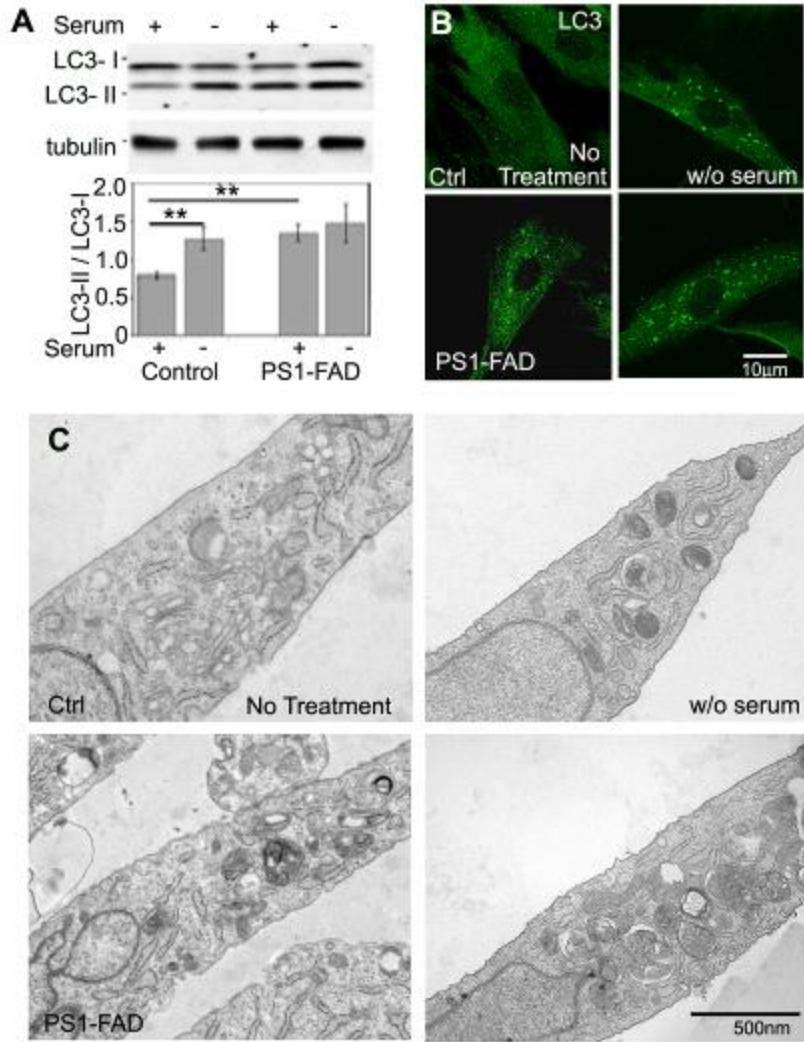

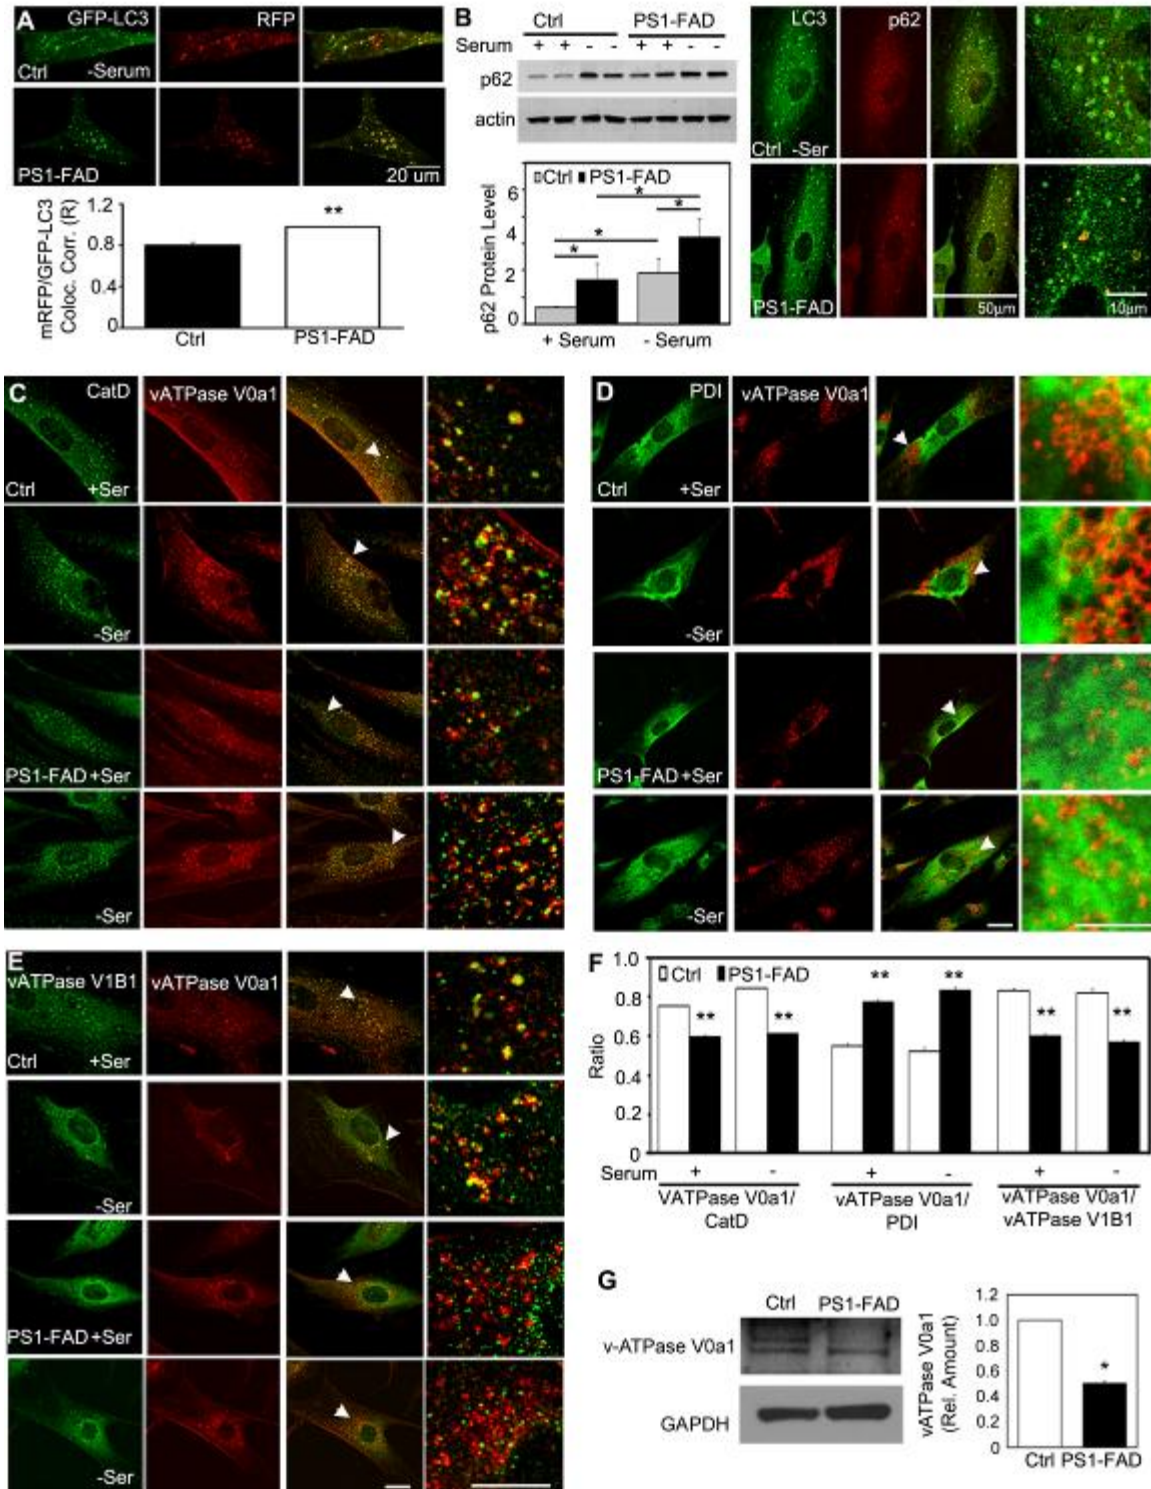



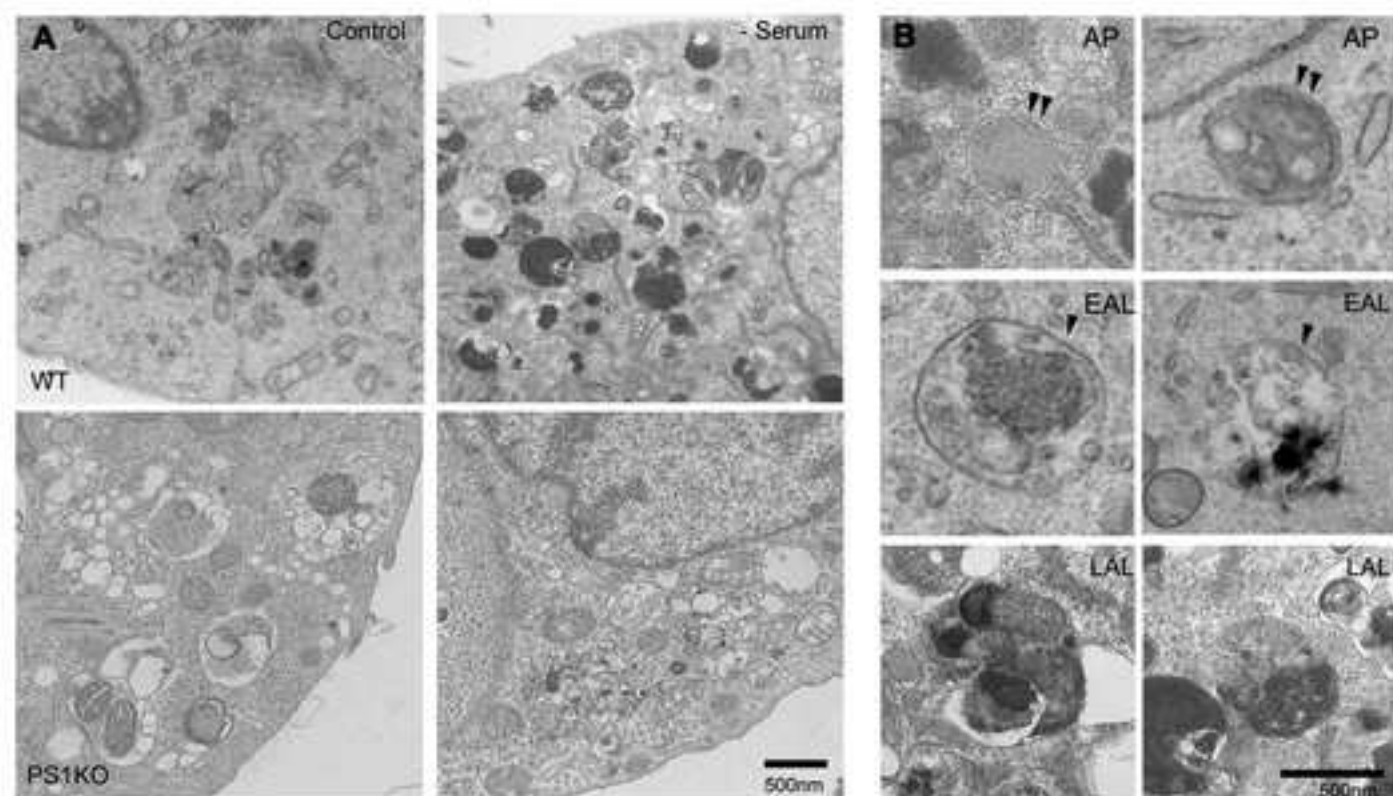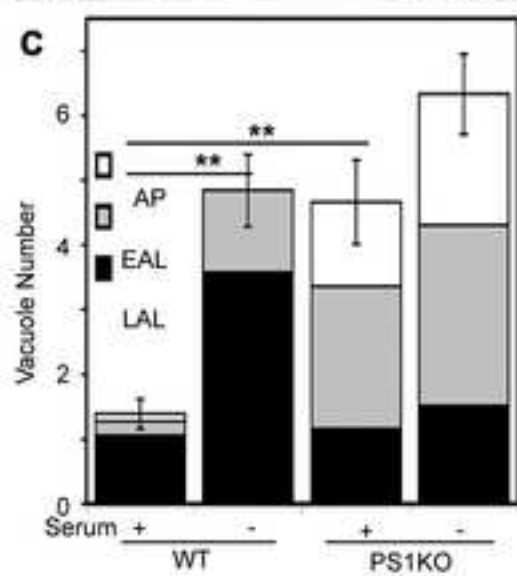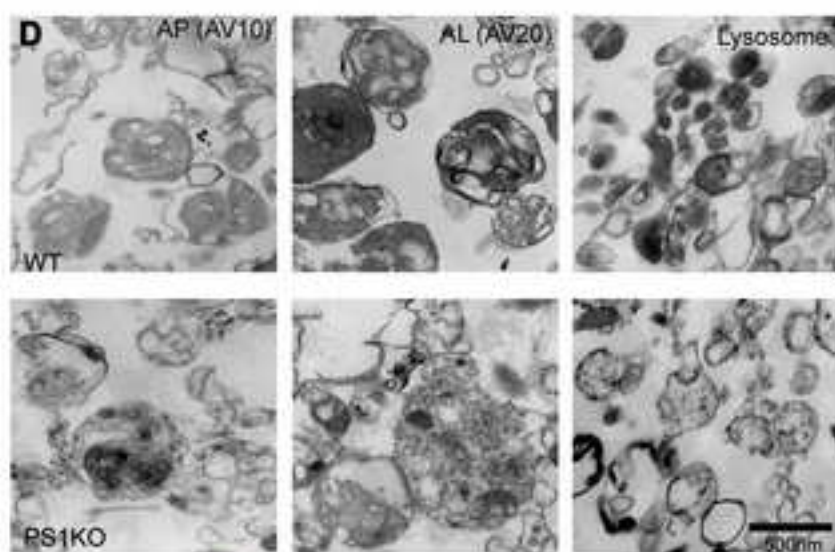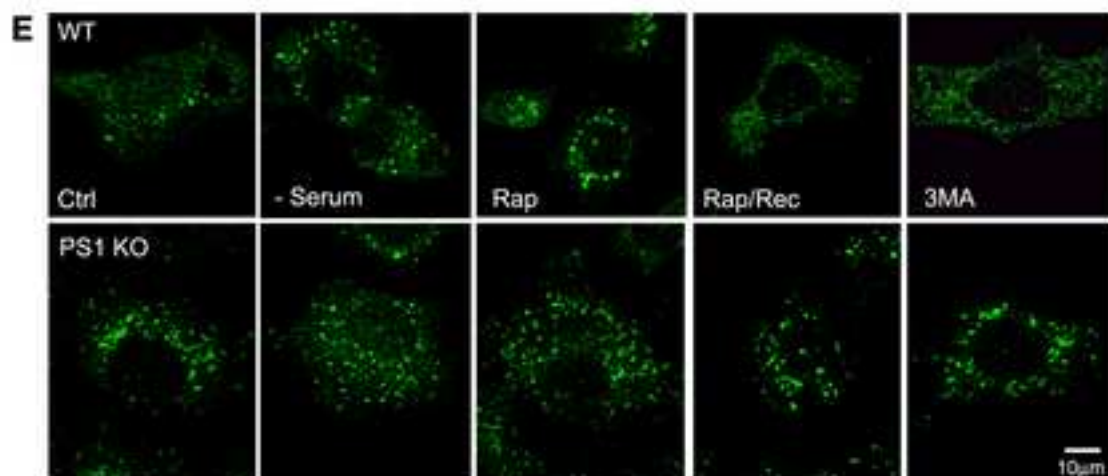



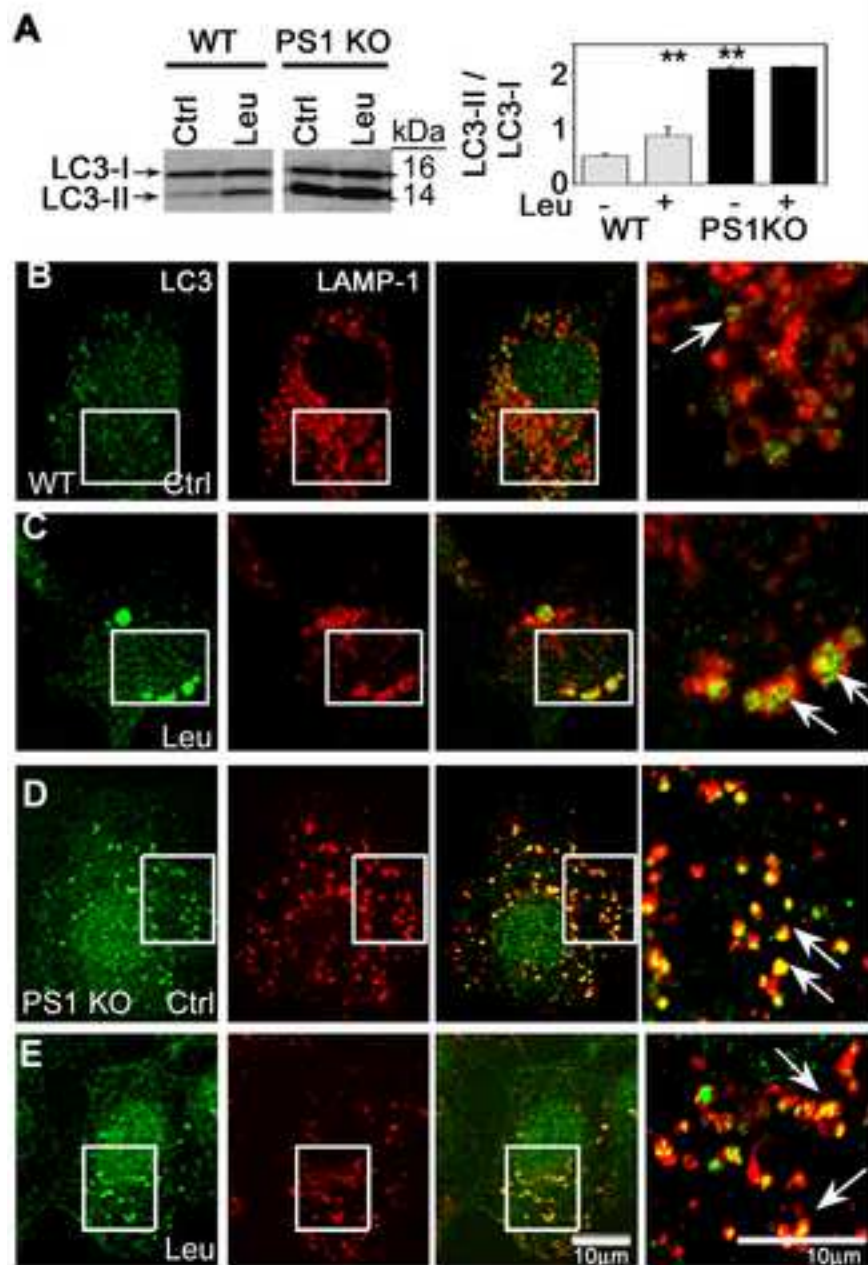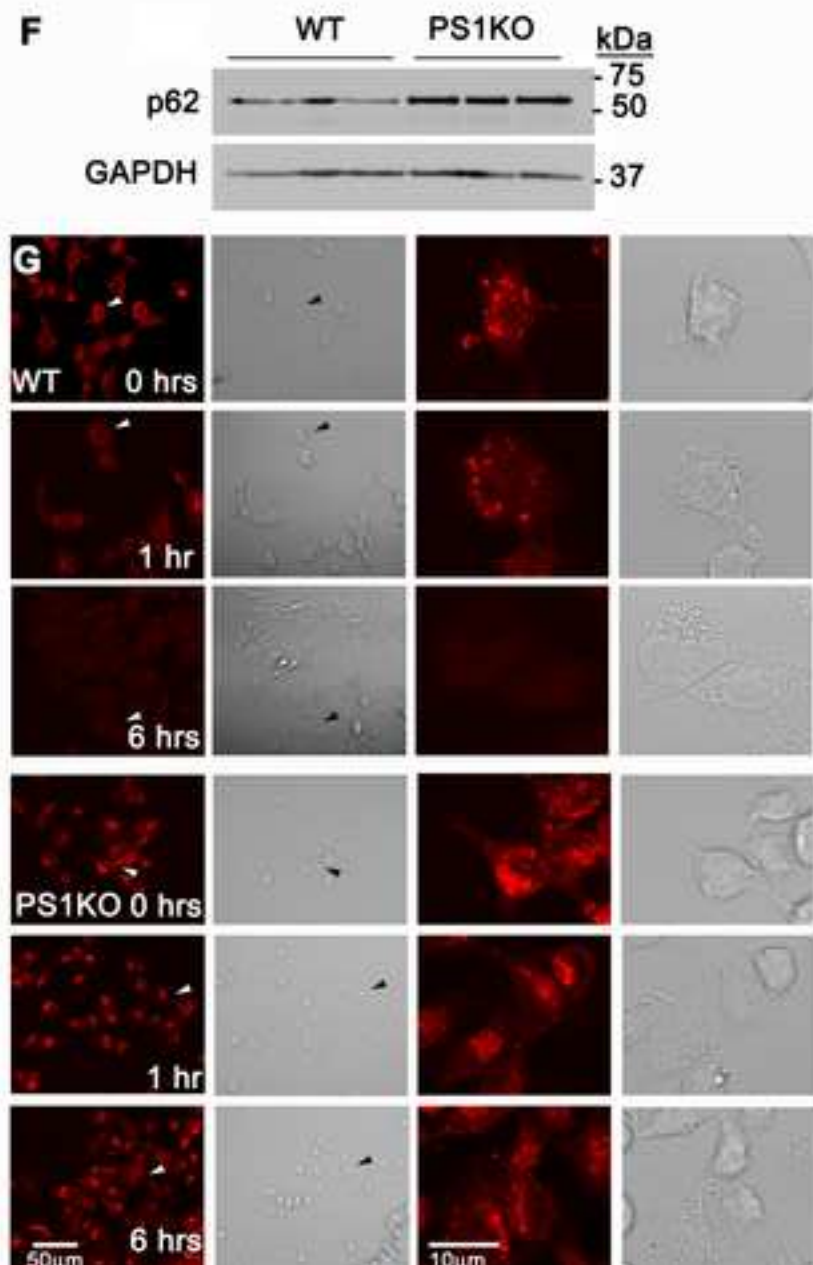

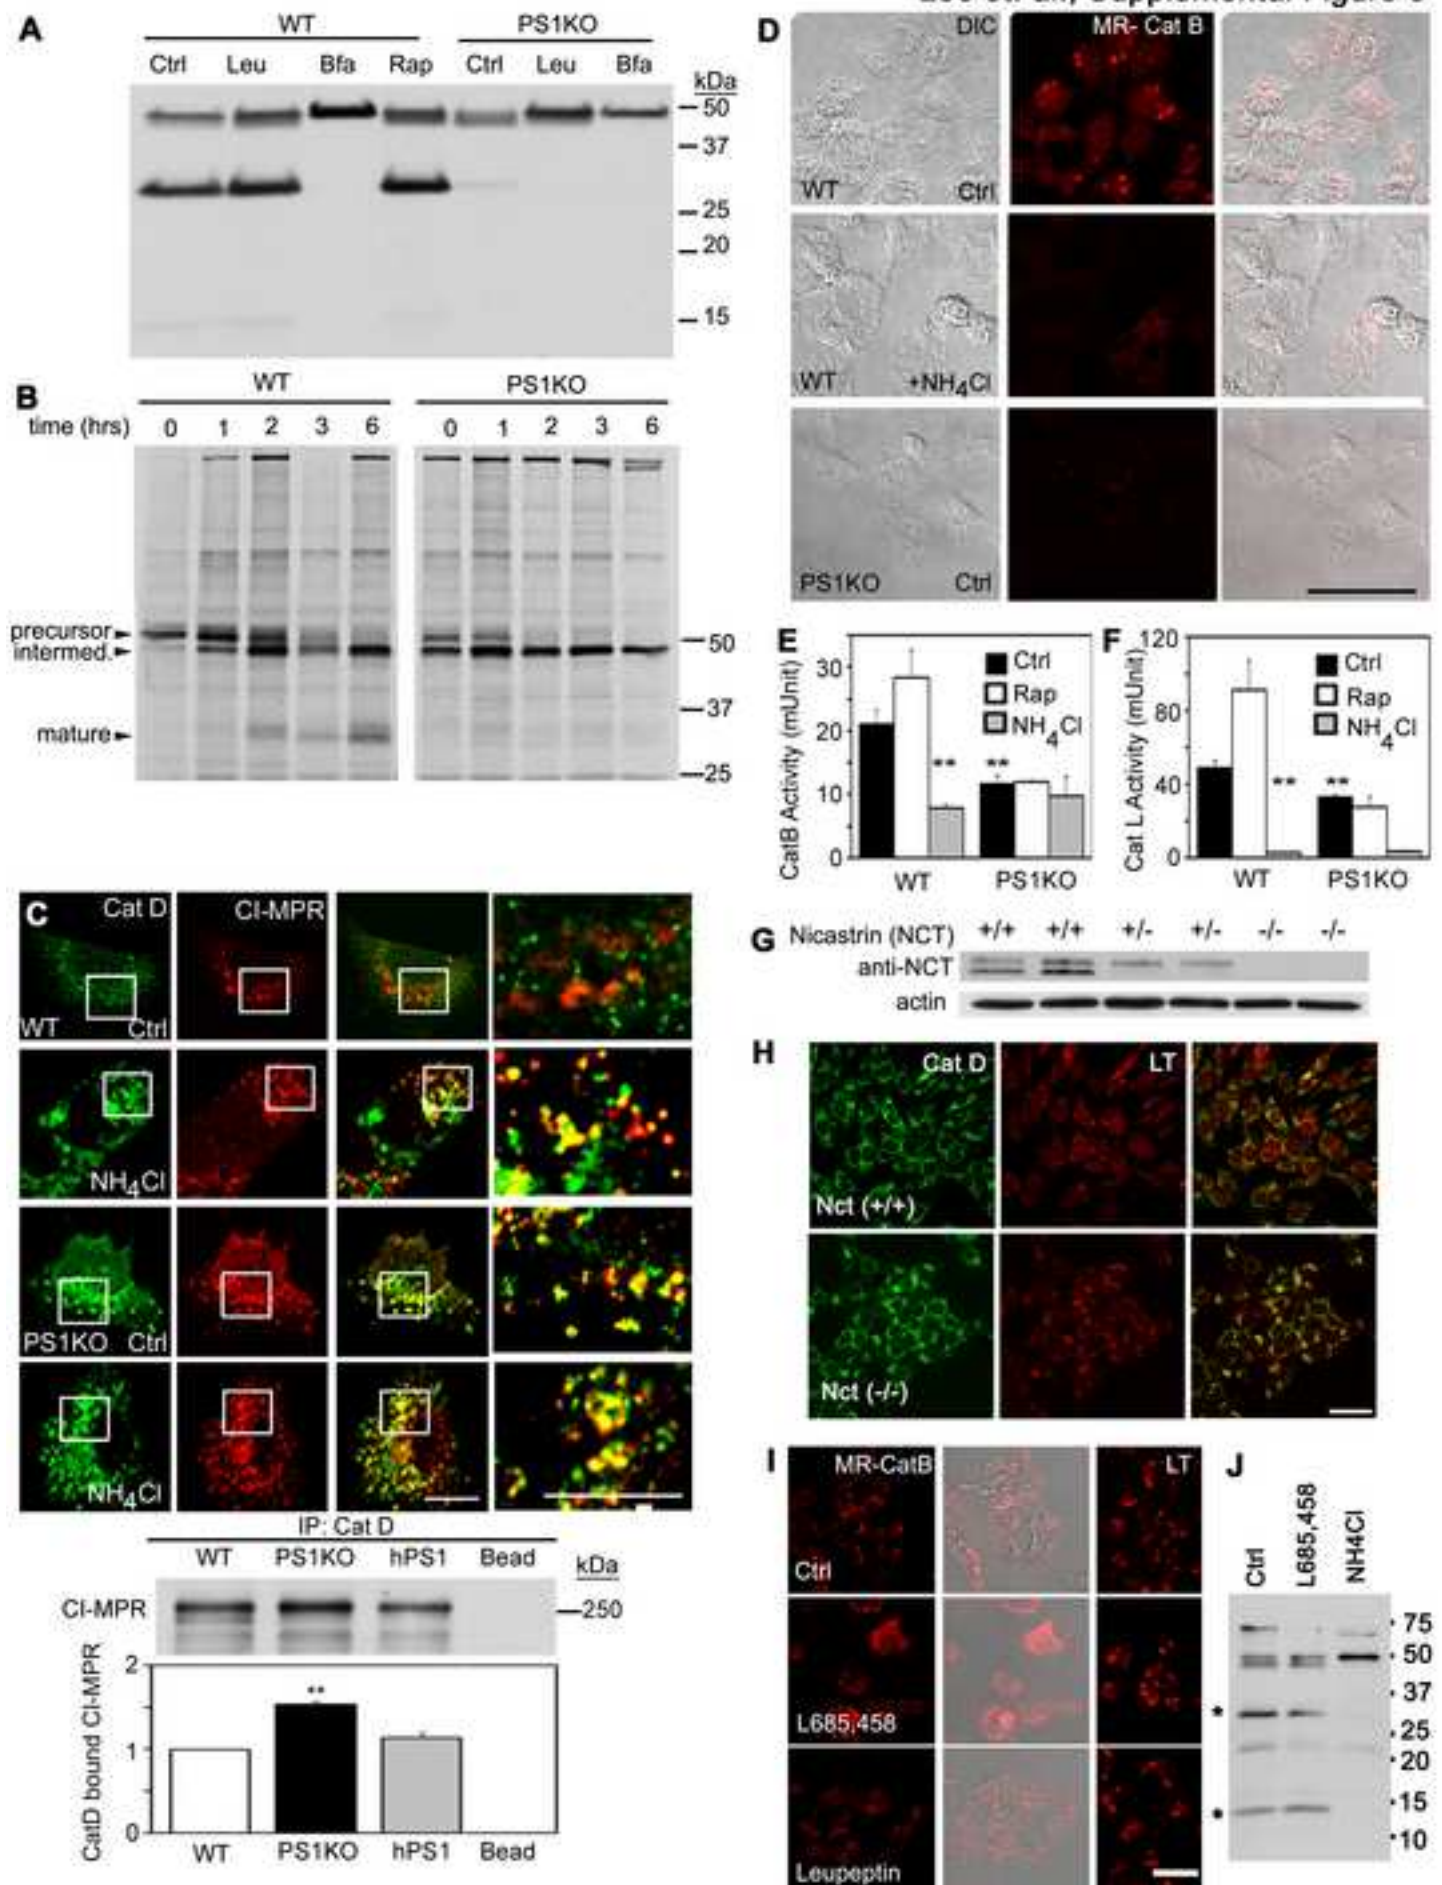

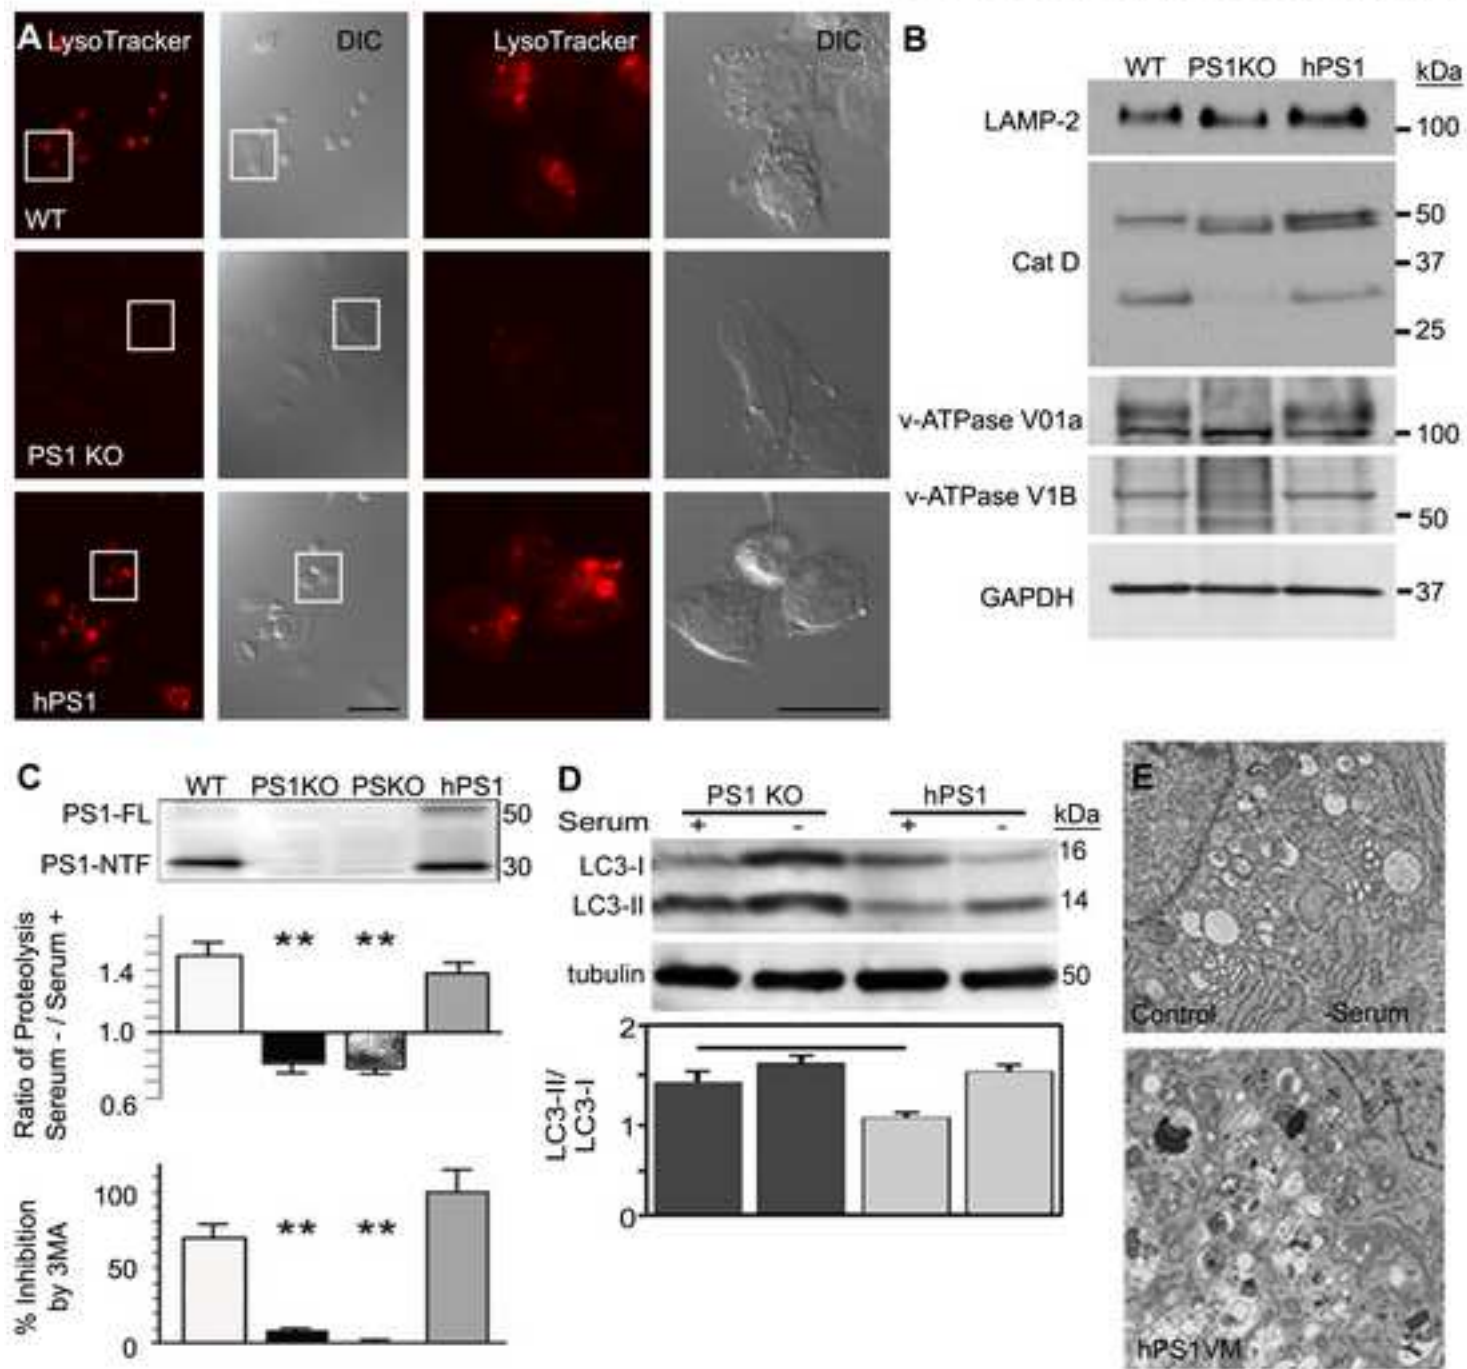



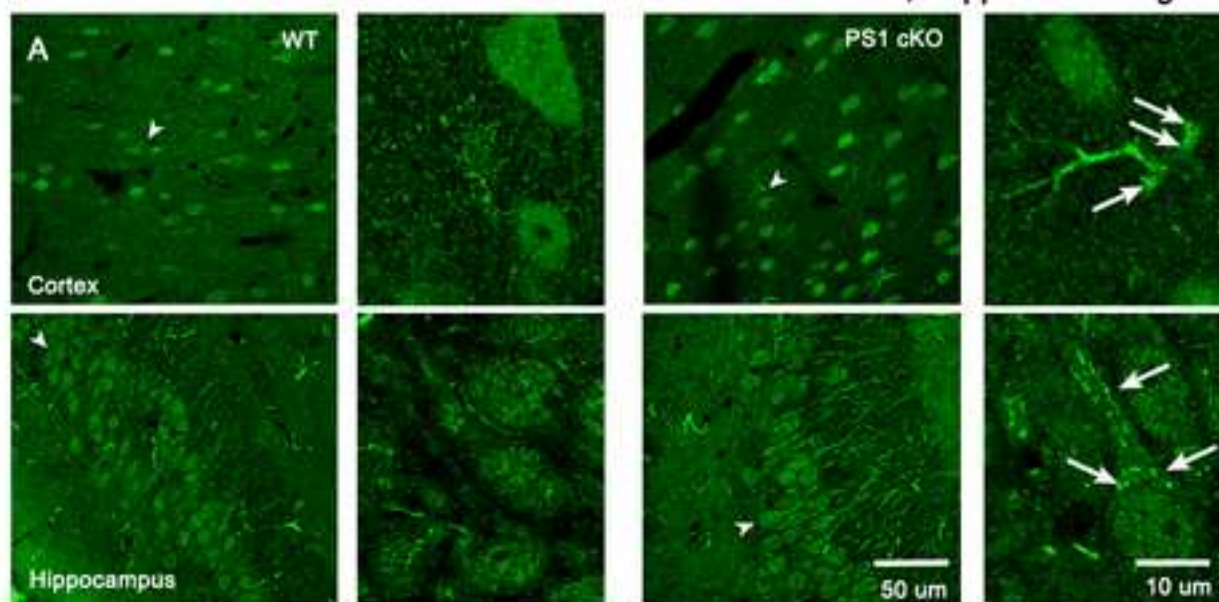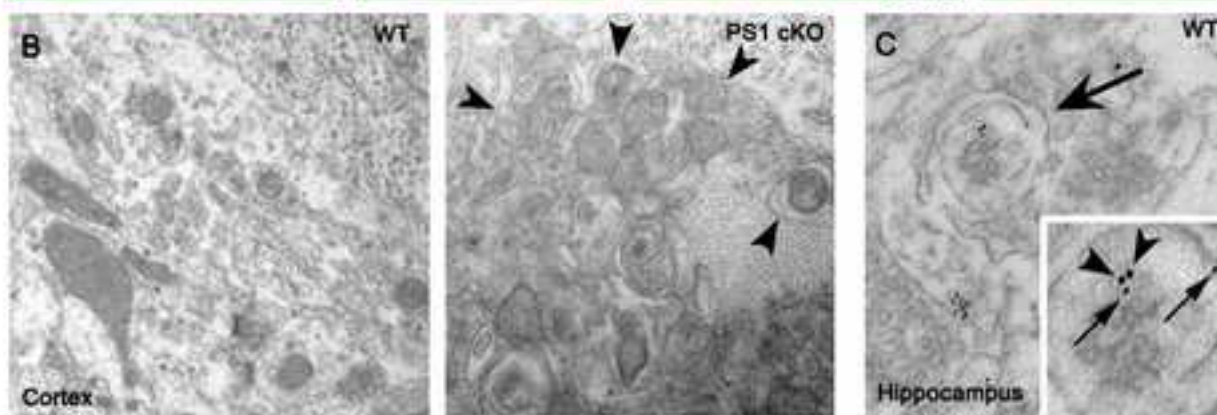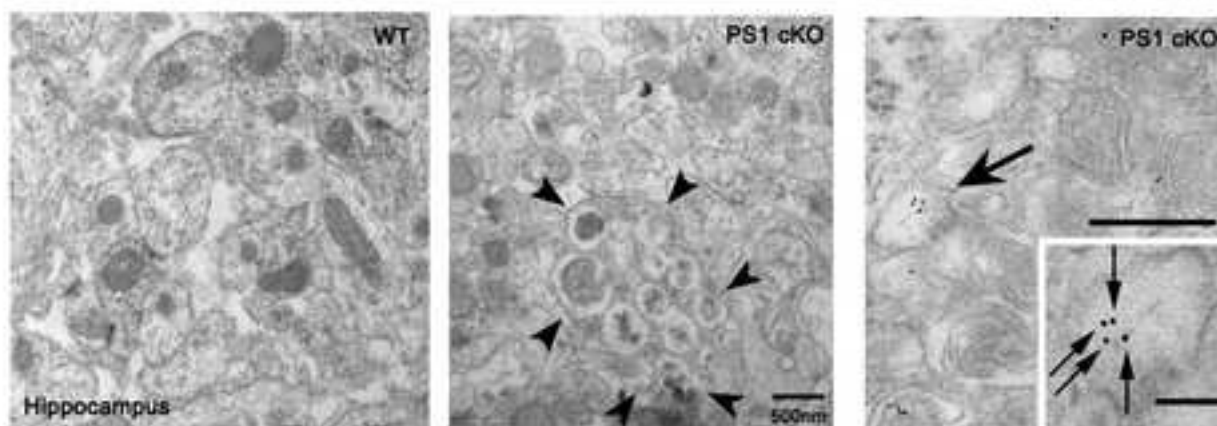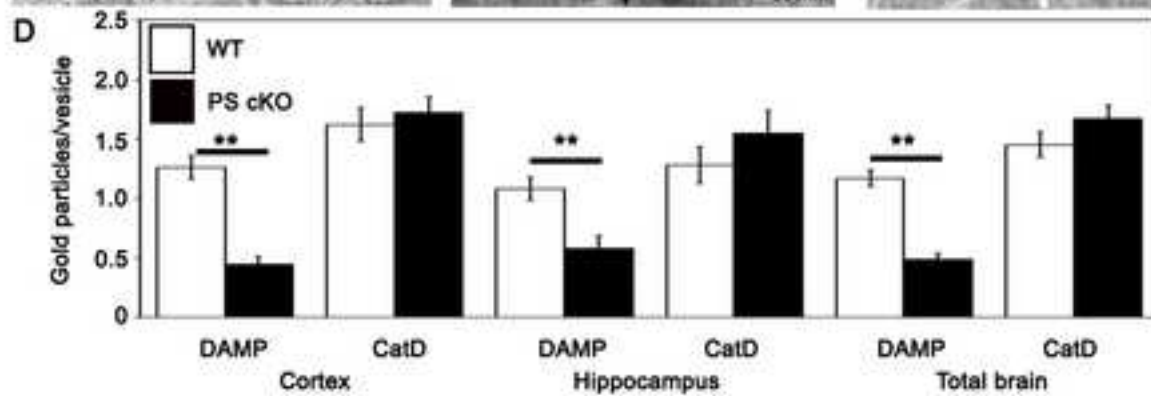

## Lee et al., Supplemental Figure 6

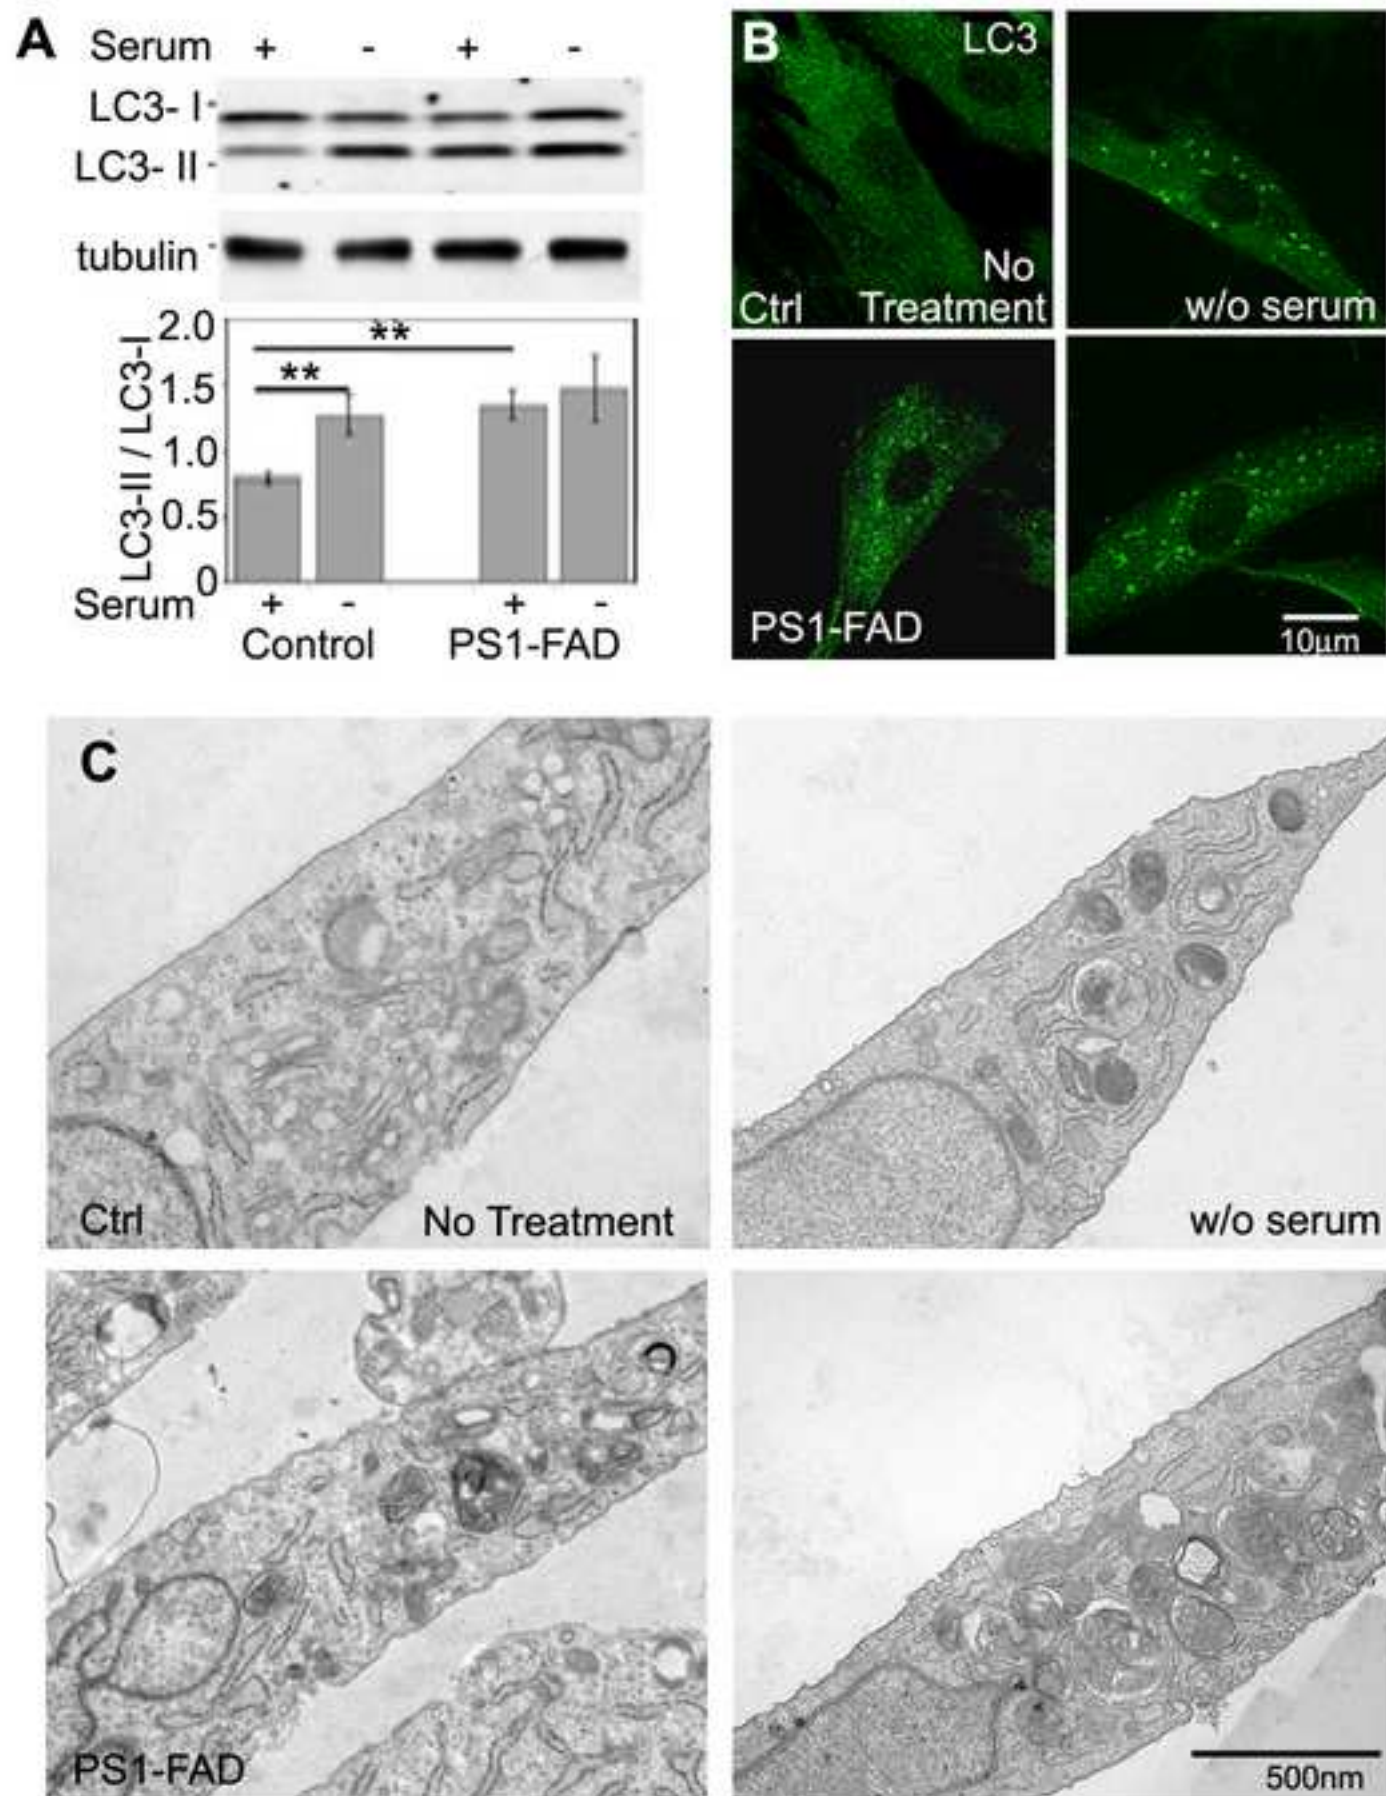



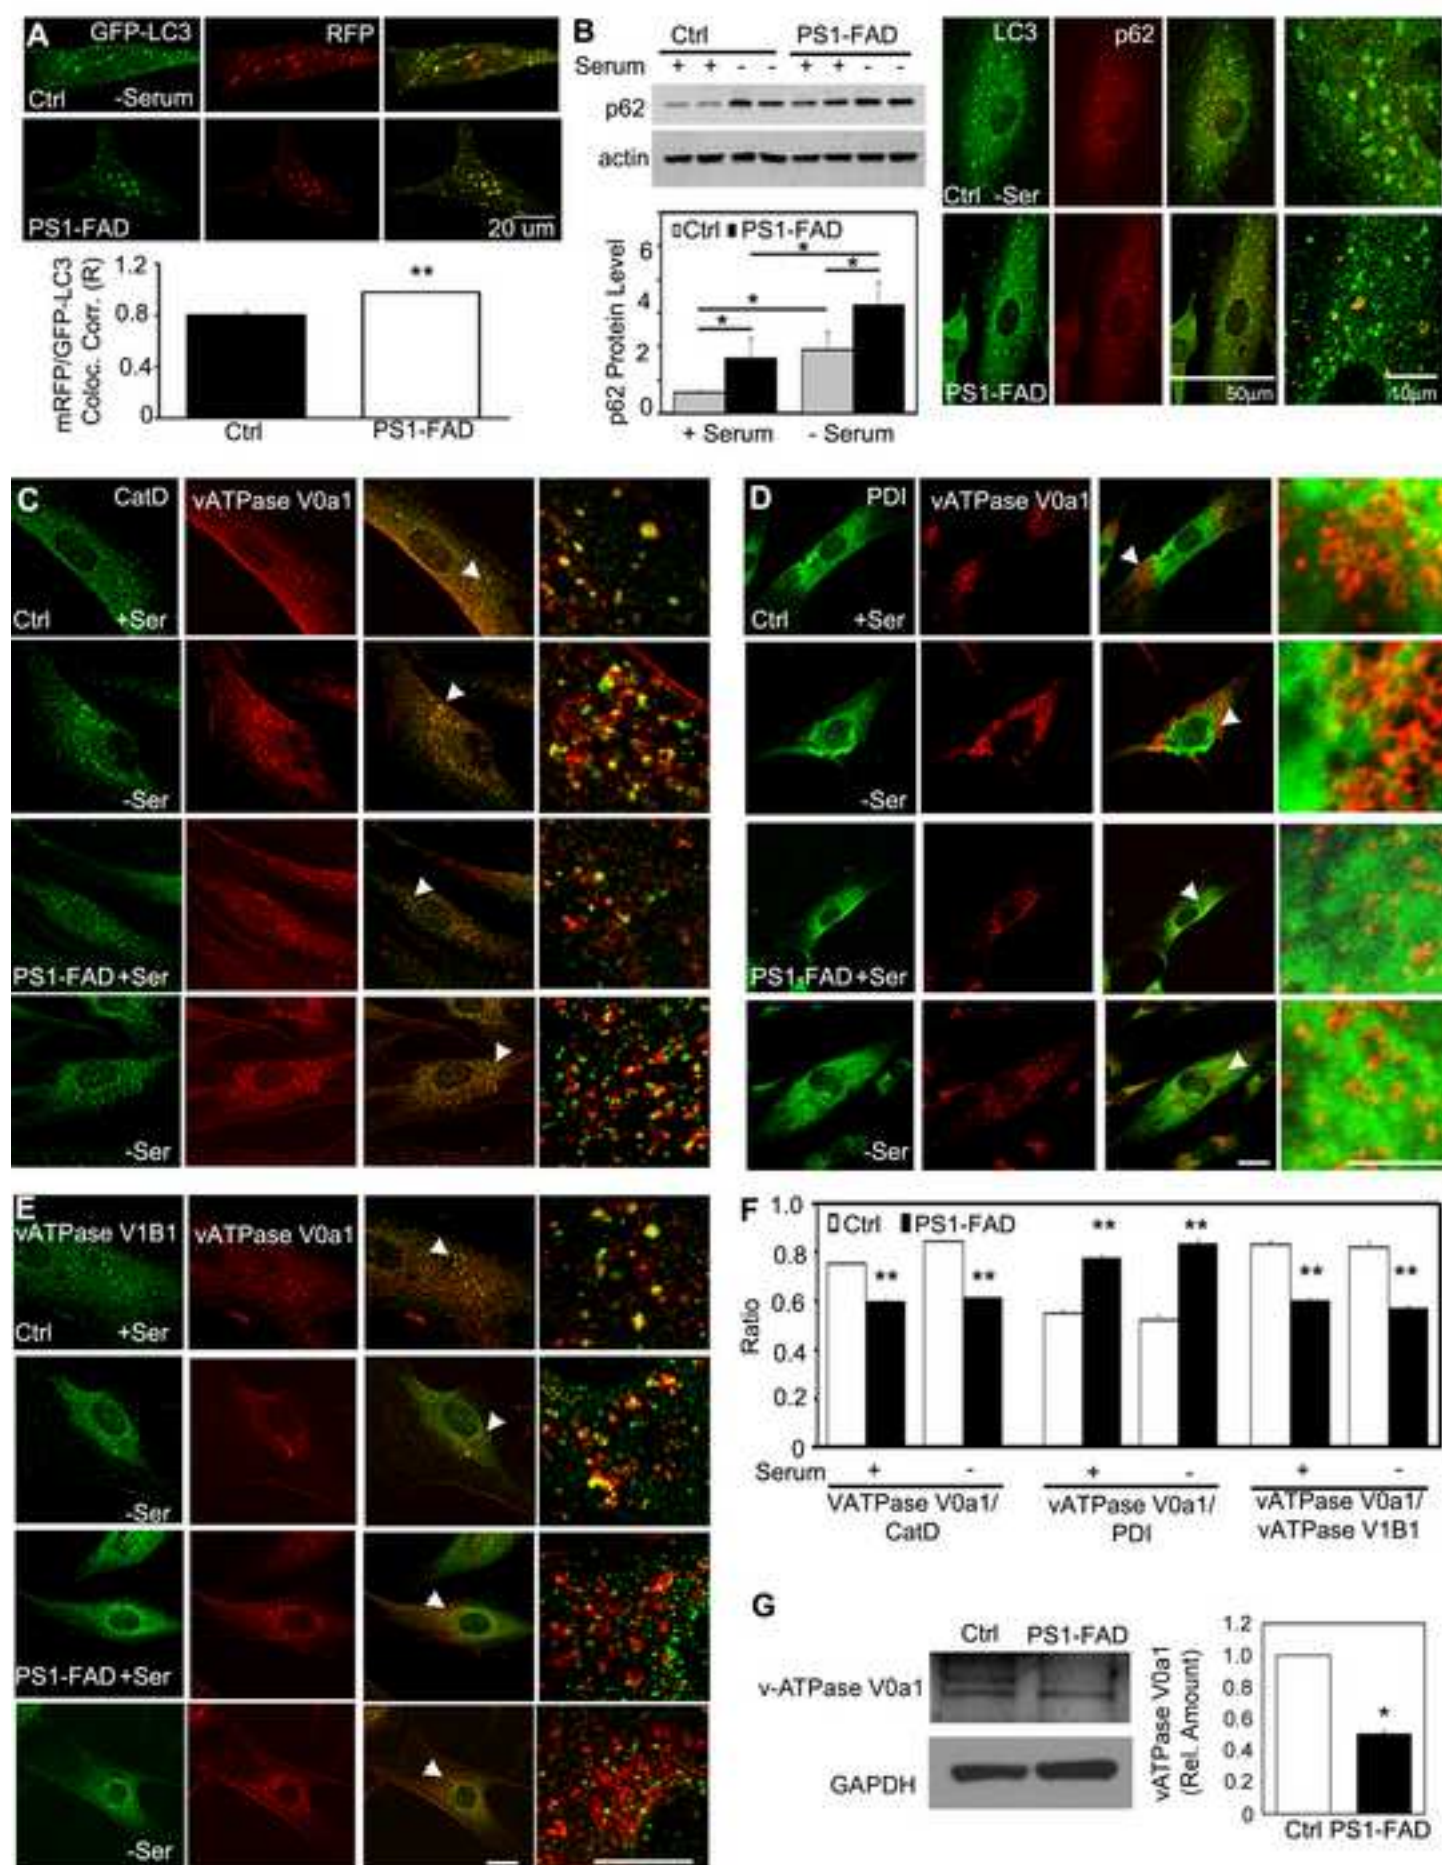

Supplement: NIHMS461844-supplement-02.pdf [file NIHMS461844-supplement-02.pdf]
